# Supplementary material for: Free Sugar Intake and Periodontal Diseases: A Systematic Review
Source: MDPI journal article supplement (doi:10.3390/nu14214444), 2022-10-22
Supplement: s1 [file s1]

# **Title: Free Sugar Intake and Periodontal Diseases: A Systematic Review**

Authors: Taro Kusama, Noriko Nakazawa, Kenji Takeuchi, Sakura Kiuchi, Ken Osaka

- **Supplementary Text S1a: Adapted Newcastle-Ottawa Scale for Cross-Sectional Studies.**
- **Supplementary Text S1b: Newcastle-Ottawa Scale for Cohort studies.**
- **Supplementary Table S1. Result table of the included studies.**
- **Supplementary Table S2. Funding source and conflicts of interests of the included studies.**

## Supplementary Text S1a: Adapted Newcastle-Ottawa Scale for Cross-Sectional Studies.

### Selection: (Maximum of 4 stars)

#### 1. Representativeness of the sample:

- a) Truly representative of the average in the target population. **(all subjects or random sampling)** \*
- b) Somewhat representative of the average in the target population. **(non-random sampling)** \*
- c) Selected group of users.
- d) No description of the sampling strategy.

#### 2. Sample size:

- a) Justified and satisfactory. \*
- b) Not justified.

#### 3. Ascertainment of exposure:

- a) Validated measurement tool. \*
- b) Non-validated measurement tool, but the tool is available or described. \*
- c) No description of the measurement tool.

#### 4. Non-respondents:

- a) Comparability between respondents and non-respondents characteristics is established, and the response rate is satisfactory. \*
- b) The response rate is unsatisfactory, or the comparability between respondents and non-respondents is unsatisfactory.
- c) No description of the response rate or the characteristics of the responders and the non-responders.

### Comparability: (Maximum of 2 stars)

#### 1. The subjects in different outcome groups are comparable, based on the study design or analysis.

##### Confounding factors are controlled:

- a) The study controls for the most important factor (sex and age). \*
- b) The study controls for at least one additional factor on the following list. \*  
sociodemographic factors (sex, age, ethnicity, etc.), socioeconomic factors (income, education, etc.) and health behaviours (smoking, diet, oral hygiene, physical activity, etc.)

### Outcome: (Maximum of 2 stars)

#### 1. Assessment of outcome:

- a) Independent blind assessment. \*
- b) Record linkage. \*
- c) Self-report. \*
- d) No description.

#### 2. Statistical test:

- a) The statistical test used to analyze the data is clearly described and appropriate, and the measurement of the association is presented, including confidence intervals or probability level (p-value). \*
- b) The statistical test is not appropriate, not described, or incomplete.

## Supplementary Text S1b: Newcastle-Ottawa Scale for Cohort Studies.

### Selection

- 1) Representativeness of the exposed cohort
  - a) truly representative of the average \_\_\_\_\_ (describe) in the community \*
  - b) somewhat representative of the average \_\_\_\_\_ in the community \*
  - c) selected group of users e.g. nurses, volunteers
  - d) no description of the derivation of the cohort
- 2) Selection of the non exposed cohort
  - a) drawn from the same community as the exposed cohort \*
  - b) drawn from a different source
  - c) no description of the derivation of the non exposed cohort
- 3) Ascertainment of exposure
  - a) secure record (e.g. surgical records) \*
  - b) structured interview \*
  - c) written self report
  - d) no description
- 4) Demonstration that outcome of interest was not present at start of study
  - a) yes \*
  - b) no

### Comparability

- 1) Comparability of cohorts on the basis of the design or analysis
  - a) study controls for age and sex (select the most important factor)
  - b) study controls for confounding factors as below \*  
[sociodemographic factors (sex, age, ethnicity, etc.), socioeconomic factors (income, education, etc.) and health behaviours (smoking, diet, oral hygiene, physical activity, etc.)]

### Outcome

- 1) Assessment of outcome
  - a) independent blind assessment \*
  - b) record linkage \*
  - c) self report
  - d) no description
- 2) Was follow-up long enough for outcomes to occur
  - a) yes (select an adequate follow up period for outcome of interest) \*
  - b) no
- 3) Adequacy of follow up of cohorts
  - a) complete follow up - all subjects accounted for \*
  - b) subjects lost to follow up unlikely to introduce bias - small number lost - > 80% (select an adequate %) follow up, or description provided of those lost) \*
  - c) follow up rate < 80% (select an adequate %) and no description of those lost
  - d) no statement

**Supplementary Table S1. Result table of the included studies.**

| ID                           | First author<br>(publication<br>year) | Targeted<br>population                                 | Participant<br>(n) | Age at<br>baseline              | clinical<br>measureme<br>nt<br>of PD | Source of free sugar                                                                                                                                                                                | categories of<br>exposure                                                                            | Effect<br>indicator | the estimates of<br>association<br>(95%CI)                                                                     | statistical methods                | Included covariates                                                                                                                                              | Effect<br>significance<br>a |
|------------------------------|---------------------------------------|--------------------------------------------------------|--------------------|---------------------------------|--------------------------------------|-----------------------------------------------------------------------------------------------------------------------------------------------------------------------------------------------------|------------------------------------------------------------------------------------------------------|---------------------|----------------------------------------------------------------------------------------------------------------|------------------------------------|------------------------------------------------------------------------------------------------------------------------------------------------------------------|-----------------------------|
| <b>Cross-sectional study</b> |                                       |                                                        |                    |                                 |                                      |                                                                                                                                                                                                     |                                                                                                      |                     |                                                                                                                |                                    |                                                                                                                                                                  |                             |
| 1                            | Chen, et al.<br>[26] (2020)           | Adolescents<br>without<br>serious<br>health<br>problem | 4,525              | 12y                             | BOP                                  | Sugar-containing<br>soft drink/soda/<br>milk/yogurt<br>/tea/coffee/water                                                                                                                            | ≤1/>1 time per<br>week<br><br>≤1/>1 time per<br>week                                                 | OR                  | 1.0 (Ref.)<br><br>2.11 (1.80, 2.49)                                                                            | Multilevel logistic<br>analysis    | Region, family size,<br>father's educational level,<br>mother's educational level,<br>brushing frequency, dental<br>floss use, dental visit.                     | *                           |
| 2                            | El Tantawi, et<br>al. [32]<br>(2018)  | Male<br>student                                        | 685                | 13-15y                          | GI (≥2)                              | Daily use of sugary<br>drinks<br><br>Daily use of sugary<br>foods                                                                                                                                   | Yes (vs No)<br><br>Yes (vs No)                                                                       | Beta                | 0.35 (-0.06, 0.75)<br><br>-0.07 (-0.45, 0.32)                                                                  | Linear regression<br>analysis      | Mother's and father's<br>education, type of<br>residence, number of<br>households, plaque index<br>score, brushing frequency,<br>smoking status                  | -<br><br>-                  |
| 3                            | Fann, et al.<br>[27]<br>(2016)        | General<br>population                                  | 10,022             | 35-44y                          | CPI (≥3)<br><br>LA (≥<br>1mm)        | Soft drinks<br>including<br>carbonated<br>beverage, cola, milk<br>tea, and juice<br>or asparagus juice                                                                                              | ≤2 times/week<br>3-4 times/week<br>≥5 times/week<br>≤2 times/week<br>3-4 times/week<br>≥5 times/week | OR                  | 1.00 (Ref.)<br>1.05 (0.92, 1.20)<br>1.17 (1.03, 1.34)<br>1.00 (Ref.)<br>1.17 (1.03, 1.32)<br>1.14 (1.01, 1.29) | Logistic<br>regression<br>analysis | Age, sex, educational level,<br>cigarette smoking, regular<br>teeth-brushing, BMI,<br>hyperglycemia, WBC,<br>intake of fruits                                    | *<br><br><br><br>*          |
| 4                            | Jagahashi, et<br>al. [33] (2012)      | Students                                               | 504                | 6-12y                           | GI (≥2)                              | Sugars containing<br>food and beverage<br>(chocolate, jam,<br>cake, biscuits,<br>muffins)                                                                                                           | ≤3 time/day<br><br>>3 time/day                                                                       | OR                  | 1.00 (Ref.)<br><br>1.82 (1.07, 3.09)                                                                           | Logistic<br>regression<br>analysis | Oral hygiene, tooth<br>brushing                                                                                                                                  | *                           |
| 5                            | Kyaw, et al.<br>[28] (2020)           | Students                                               | 537                | Mean:<br>10.6y<br>(1SD=0.7<br>) | PMA index                            | Sweet snack<br><br>Sweet drink                                                                                                                                                                      | Daily (vs not daily)<br><br>Daily (vs not daily)                                                     | Beta                | -0.12 (-1.28, 1.04)<br><br>1.65 (0.54, 2.76)                                                                   | Linear regression<br>analysis      | Sex, parents' occupation,<br>tooth brushing frequency,<br>mouth-rinsing habits,<br>dental visits, OHI-S score,<br>bacteria level                                 | -<br><br>*                  |
| 6                            | Lula, et al. [17]<br>(2014)           | General<br>population                                  | 2,437              | 18-25y                          | PPD≥3mm<br>and BOP                   | Added sugar intake<br>(food and beverage)<br>including cakes,<br>cookies, brownies,<br>ice cream, ice milk,<br>milkshakes,<br>chocolate candy,<br>fudge, Hi-C, Tang,<br>Kool-Aid, cola, and<br>soda | 0 time/month<br><br>1-22 times/month<br><br>23-396 times/month                                       | PR                  | 1.00 (Ref.)<br><br>1.52 (1.15, 2.01)<br><br>1.54 (1.10, 2.14)                                                  | Poisson regression<br>analysis     | Sex, age, race-ethnicity,<br>education, poverty-income<br>ratio, self-reported<br>diabetes, serum cotinine<br>concentration, refined<br>starchy food intake, BMI | *                           |



|                     |                                |                          |     |       |                                                                     |                                                                                                                                                                     |                             |      |                                                           |                            |                                                                                                    |   |
|---------------------|--------------------------------|--------------------------|-----|-------|---------------------------------------------------------------------|---------------------------------------------------------------------------------------------------------------------------------------------------------------------|-----------------------------|------|-----------------------------------------------------------|----------------------------|----------------------------------------------------------------------------------------------------|---|
| 12                  | Vitosyte, et al. [35] (2022)   | General population       | 453 | 35-74 | Number of teeth with PPD≥ 4mm)                                      | Frequency of eating or drinking any of following food/drink: cake, sweet buns/breads, jam, honey, sweets, candies, soft, drinks, tea with sugar, coffee with sugar. | Lower<br>Moderate<br>Higher | Beta | 0.00 (Ref.)<br>-0.56 (-1.83, 0.63)<br>-0.87 (-2.36, 0.62) | Linear regression analysis | Smoking frequency, alcohol use, dental visit, use of fluoride toothpaste, tooth-brushing frequency | - |
| <b>Cohort study</b> |                                |                          |     |       |                                                                     |                                                                                                                                                                     |                             |      |                                                           |                            |                                                                                                    |   |
| 13                  | Yoshihara, et al. [29 ] (2009) | Independent older adults | 261 | 70y   | No of teeth with periodontal event (≥ 3mm deeper PPD from baseline) | Cereals, nuts and seeds, sugar and sweeteners, confectioneries                                                                                                      | g/kg                        | Beta | 0.19 (0.01, 0.38)                                         | Linear regression analysis | Dark green and yellow vegetables intake, alcohol (g/kg), number of remaining teeth at baseline.    | * |

NOTE: <sup>a</sup> \* indicates the significance association between free sugar intake and periodontal diseases (p<0.05).

Abbreviation: PD=periodontal diseases; BOP=bleeding on probing; GI=Löe and Sillness's gingival index; CPI=community periodontal index; LA=loss of attachment; PPD=probing pocket depth; CAL=clinical attachment level; OR=odds ratio; PR=prevalence ratio; MR=mean ratio; 95%CI=95% confidence interval.

**Supplementary Table S2. Funding source and conflicts of interests of the included studies.**

| ID                           | First author<br>(publication year) | Country                 | Targeted<br>population                              | Participants<br>(n) | Age at<br>baseline       | funding source                                                                                                                                                                                                                                                                                                                                                                                                                                                                                                                         | conflicts<br>of<br>interests |
|------------------------------|------------------------------------|-------------------------|-----------------------------------------------------|---------------------|--------------------------|----------------------------------------------------------------------------------------------------------------------------------------------------------------------------------------------------------------------------------------------------------------------------------------------------------------------------------------------------------------------------------------------------------------------------------------------------------------------------------------------------------------------------------------|------------------------------|
| <b>Cross-sectional study</b> |                                    |                         |                                                     |                     |                          |                                                                                                                                                                                                                                                                                                                                                                                                                                                                                                                                        |                              |
| 1                            | Chen, et al. [26]<br>(2020)        | China                   | Adolescents without<br>serious health problem       | 4,525               | 12y                      | National Natural Science Foundation of China grant (No. 81970948), and Scientific Research in the Public Interest grant (No.201502002).                                                                                                                                                                                                                                                                                                                                                                                                | No                           |
| 2                            | El Tantawi, et al.<br>[32] (2018)  | Saudi Arabia            | Male student                                        | 685                 | 13-15y                   | None                                                                                                                                                                                                                                                                                                                                                                                                                                                                                                                                   | No                           |
| 3                            | Fann, et al. [27]<br>(2016)        | Taiwan                  | General population                                  | 10,022              | 35-44y                   | None                                                                                                                                                                                                                                                                                                                                                                                                                                                                                                                                   | No                           |
| 4                            | Jagahashi, et al.<br>[33] (2012)   | Syrian Arab<br>Republic | Students                                            | 504                 | 6-12y                    | N/A                                                                                                                                                                                                                                                                                                                                                                                                                                                                                                                                    | N/A                          |
| 5                            | Kyaw, et al. [28]<br>(2020)        | Myanmar                 | Students                                            | 537                 | Mean: 10.6y<br>(1SD=0.7) | Dental hygiene research grant 2018 from the FUTOKU Foundation (Tokyo, Japan), and the Tokyo Medical and Dental University (Tokyo, Japan).                                                                                                                                                                                                                                                                                                                                                                                              | No                           |
| 6                            | Lula, et al. [17]<br>(2014)        | US                      | General population                                  | 2,437               | 18-25y                   | Fundação de Amparo à Pesquisa e ao Desenvolvimento Científico e Tecnológico do Maranhão (FAPEMA)                                                                                                                                                                                                                                                                                                                                                                                                                                       | No                           |
| 7                            | Menezes, et al.<br>[30] (2019)     | Brazil                  | Pregnant women in 22nd to<br>25th week of pregnancy | 1,185               | N/A                      | CNPq (Conselho Nacional de Desenvolvimento Científico e Tecnológico—Portuguese acronym for the Brazilian National Research Council), grants 471923/2011-7 and 561058/2010-5; FAPESP (Fundação de Amparo à Pesquisa do Estado de São Paulo—Portuguese acronym for the São Paulo Research Foundation), grant 2008-53593-0; and FAPEMA (Fundação de Amparo à Pesquisa e ao Desenvolvimento Científico e Tecnológico do Maranhão—Portuguese acronym for the Maranhão State Research Foundation), grants 0035/2008, 00356/11, and 01362-11. | No                           |
| 8                            | Moreira, et al. [31]<br>(2021)     | Brazil                  | General population                                  | 2,515               | 18-19y                   | FAPEMA (Maranhão State Foundation for Research and Scientific and Technological Development), CNPq (National Council for Scientific and Technological Development) and CAPES (Coordination for the Improvement of Higher Education Personnel).                                                                                                                                                                                                                                                                                         | No                           |
| 9                            | Simon, et al. [36]<br>(2003)       | Ethiopia                | Students in public and<br>private school            | 1,736               | 12-18y                   | N/A                                                                                                                                                                                                                                                                                                                                                                                                                                                                                                                                    | N/A                          |
| 10                           | Song, et al. [16]<br>(2016)        | South Korea             | General population                                  | 5,517               | 19-39y                   | N/A                                                                                                                                                                                                                                                                                                                                                                                                                                                                                                                                    | N/A                          |
| 11                           | Vilarrasa, et al.<br>[34] (2021)   | Spain                   | Patients with dental<br>implants                    | 169                 | mean 54.5y<br>(1SD=11.7) | None                                                                                                                                                                                                                                                                                                                                                                                                                                                                                                                                   | No                           |
| 12                           | Vitosyte, et al.<br>[35] (2022)    | Lithuania               | General population                                  | 453                 | 35-74                    | The Lithuanian National Oral Health Survey was funded by the Borrow Foundation, United Kingdom, grant number 3303900.                                                                                                                                                                                                                                                                                                                                                                                                                  | No                           |
| <b>Cohort study</b>          |                                    |                         |                                                     |                     |                          |                                                                                                                                                                                                                                                                                                                                                                                                                                                                                                                                        |                              |
| 13                           | Yoshihara, et al.<br>[29] (2009)   | Japan                   | Independent older adults                            | 261                 | 70y                      | Grant-in-Aid from the Ministry of Health and Welfare of Japan (H16-Iryo-001), by the Ministry of Education, Science, Sports and Culture of Japan (Grant No. 17592177), and by Japan Daily Association (18–06).                                                                                                                                                                                                                                                                                                                         | N/A                          |
